# Supplementary material for: Cell-Type Specific DNA Methylation Patterns Define Human Breast Cellular Identity
Source: PubMed Central journal article supplement (PMC3527522; doi:10.1371/journal.pone.0052299), 2012-12-20

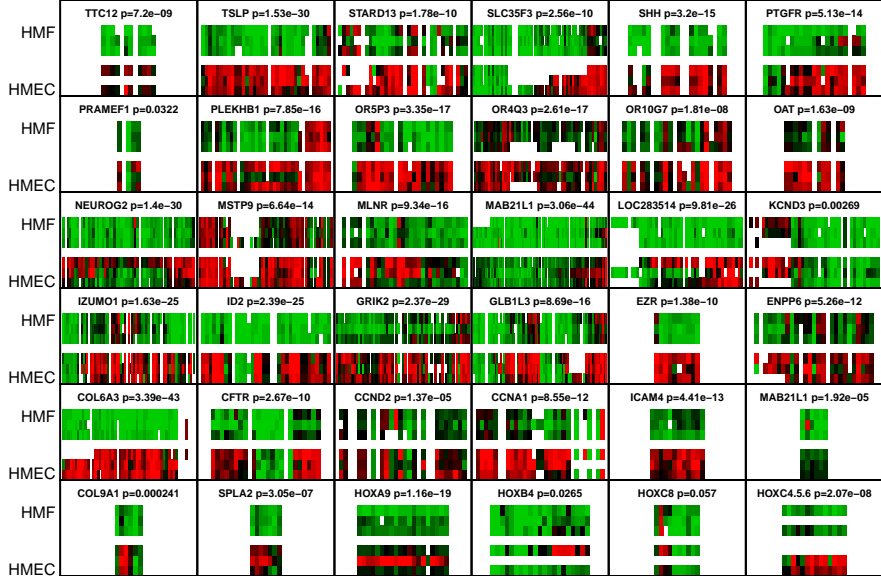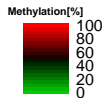

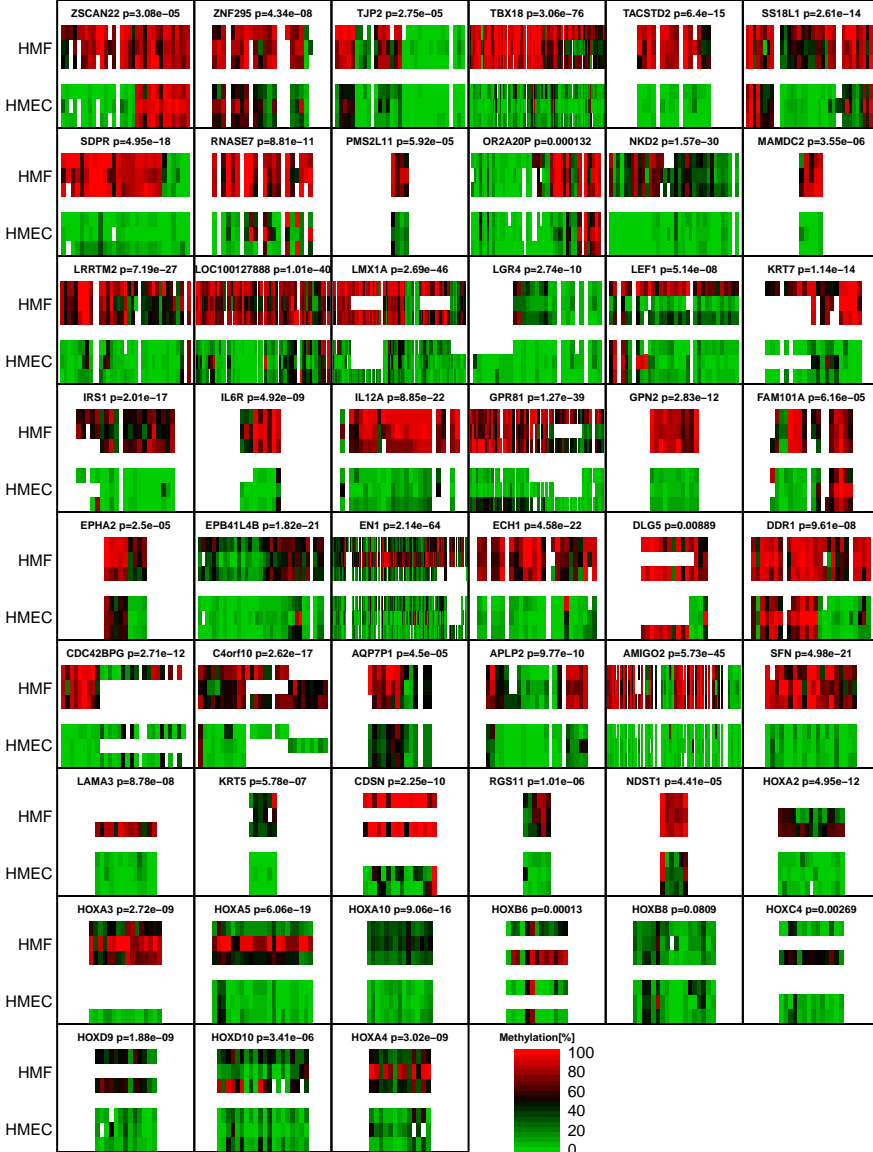

# AMIGO2

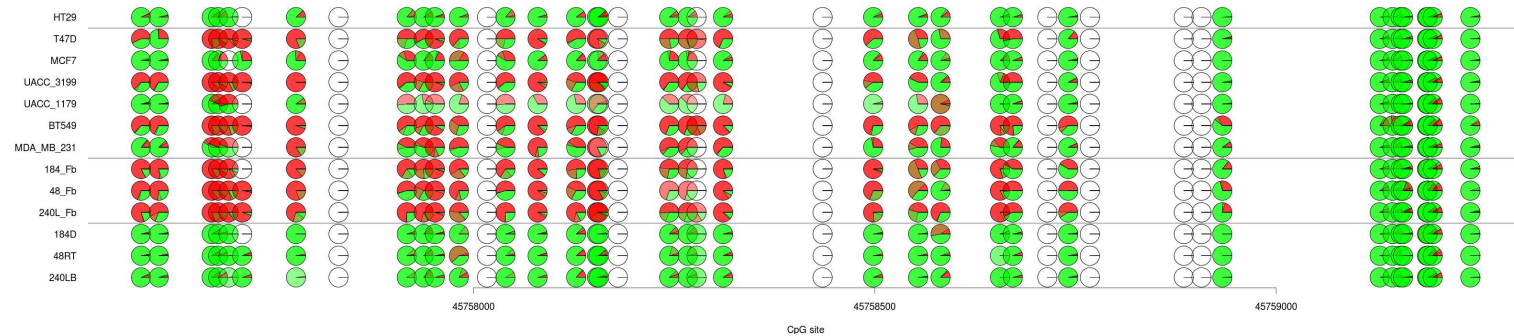

# APLP2

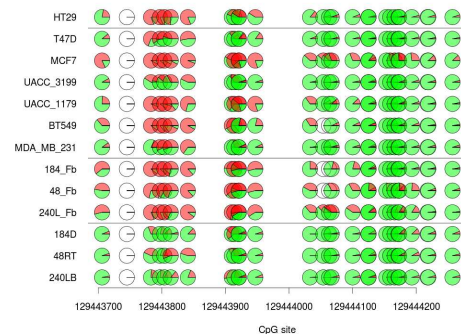

# AQP7P1

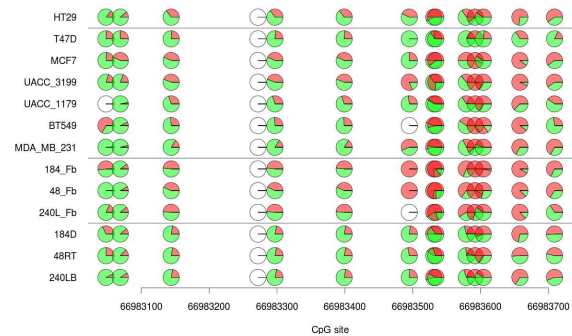



# CCNA1

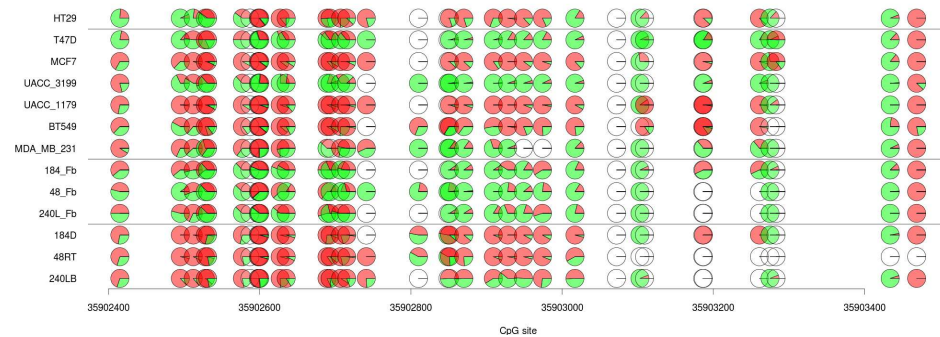







# CFTR

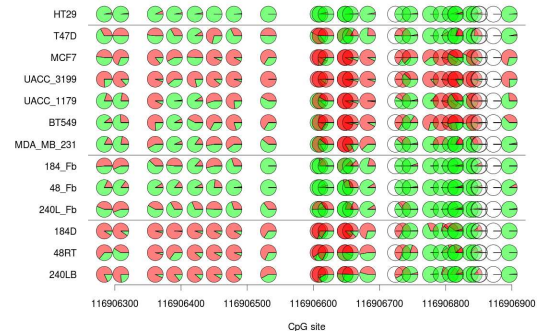

# COL6A3

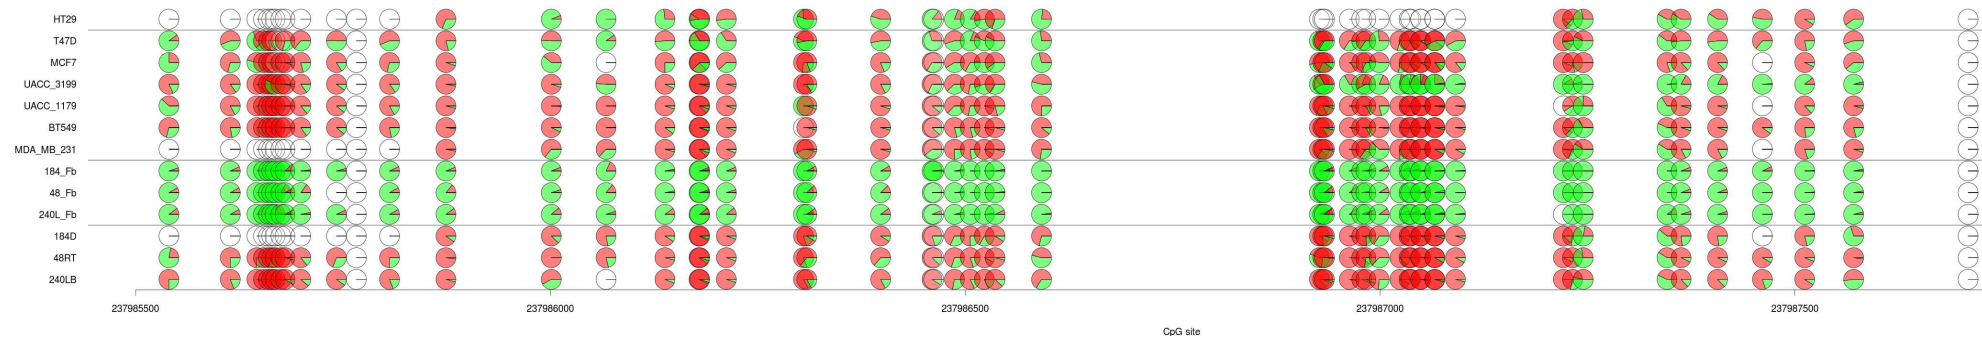

# DDR1

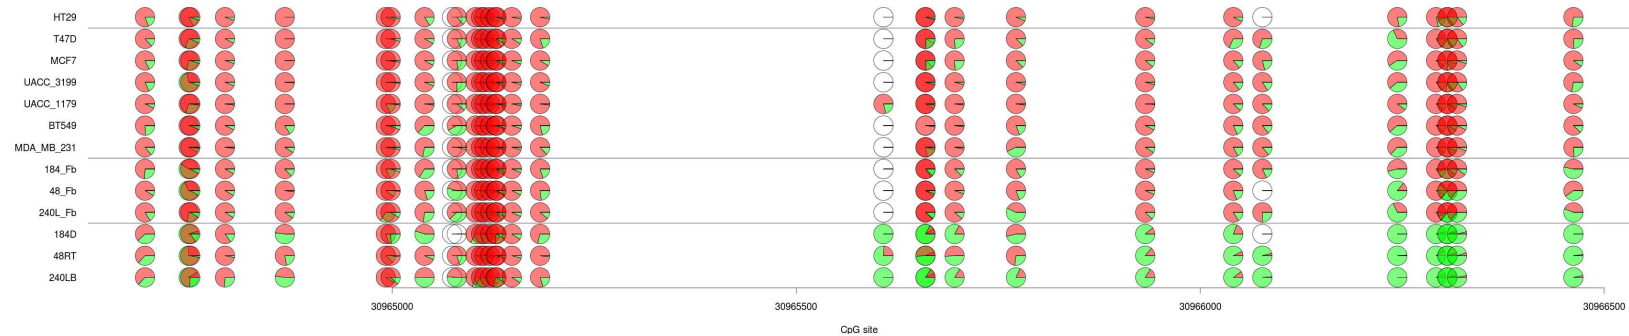

# DLG5

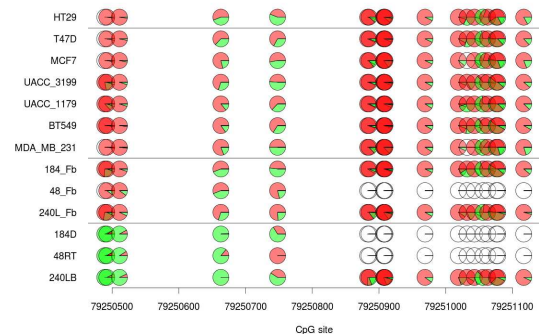

# ECH1

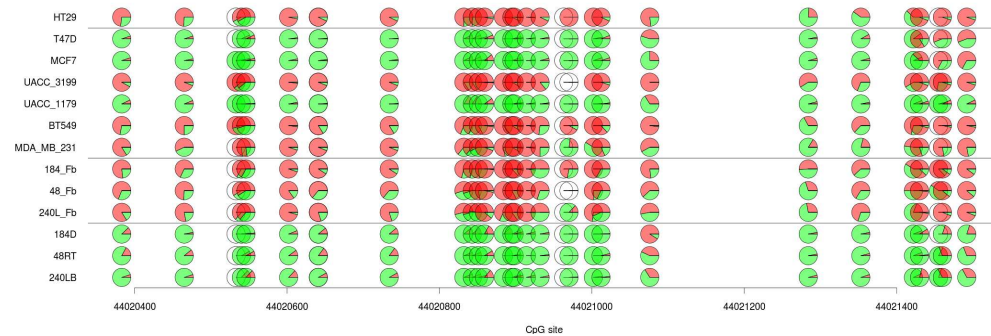

# EN1

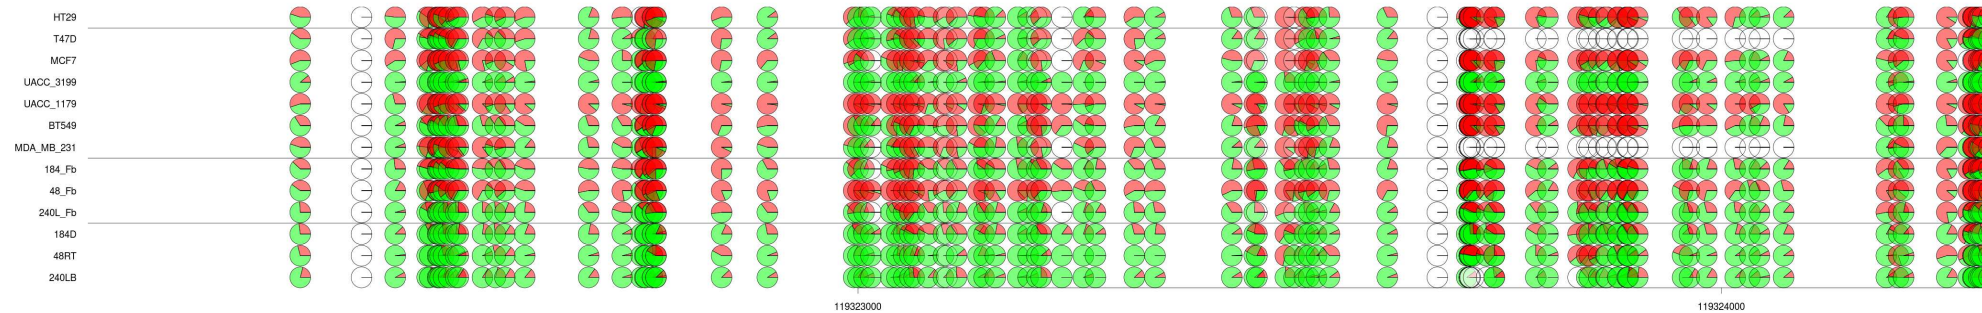

# ENPP6

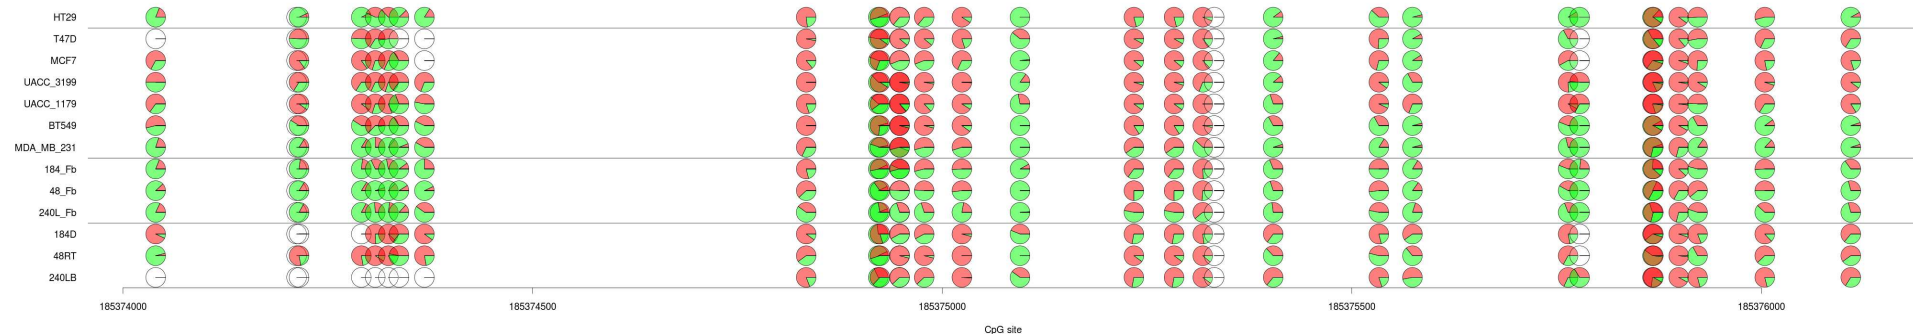



# EPB41L4B

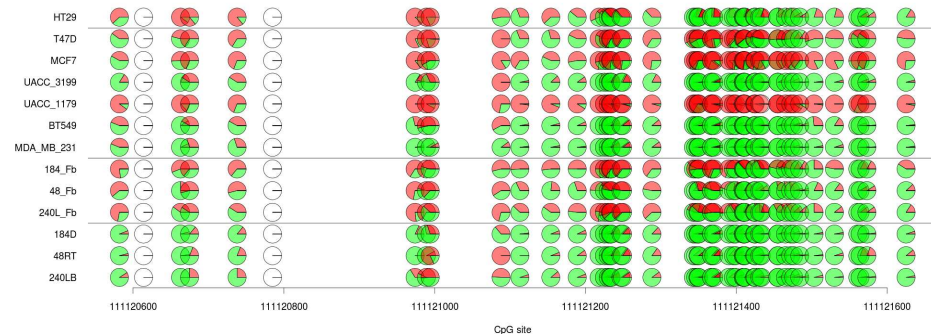



# EZR

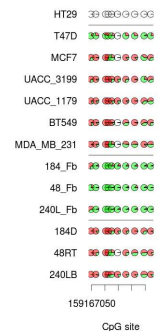

# FAM101A

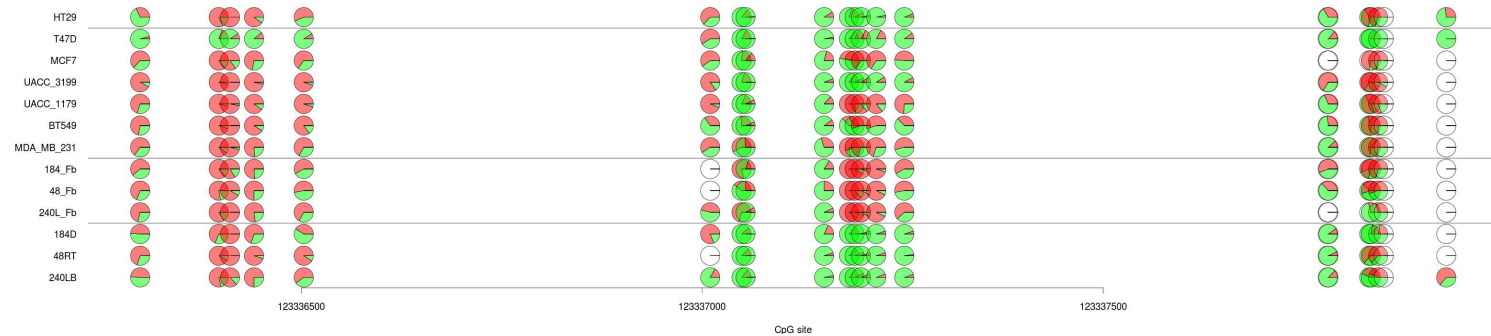

# GLB1L3

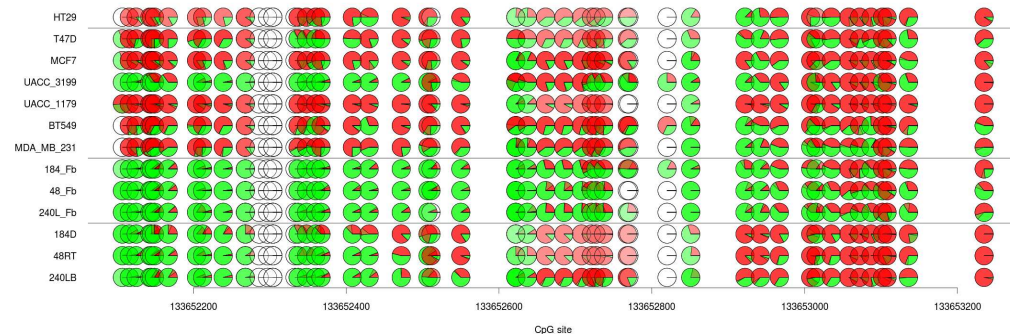





# GRIK2

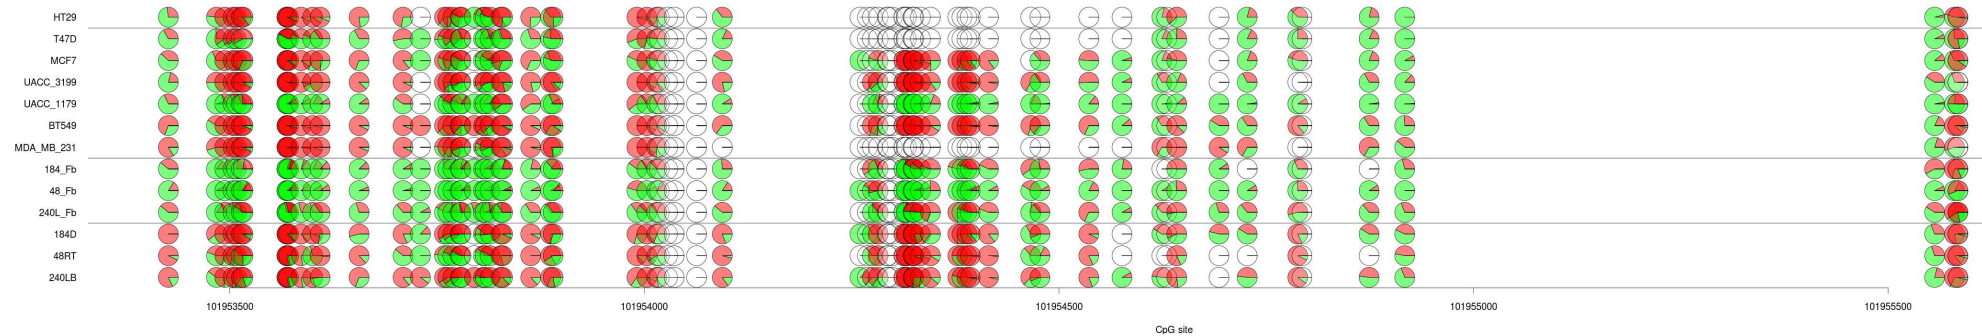





# IL12A

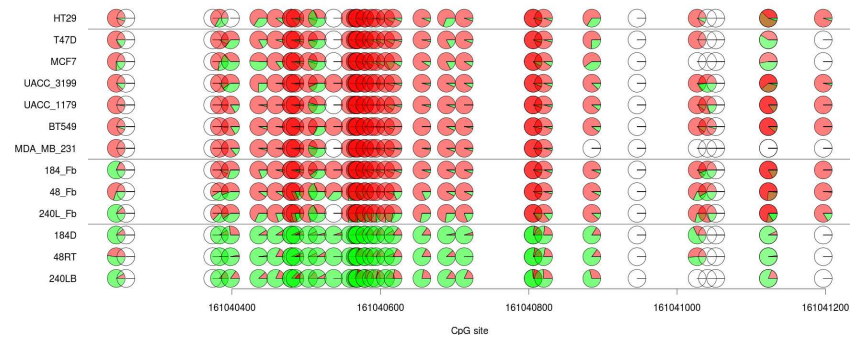

# IL6R

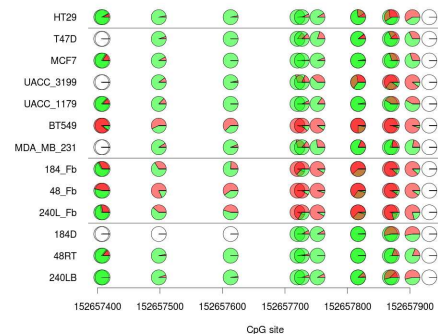

# IRS1

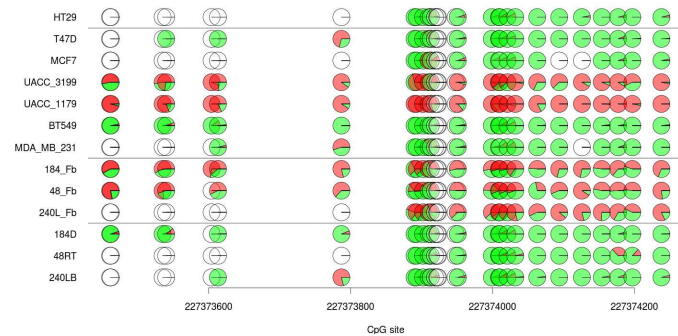

# IZUMO1

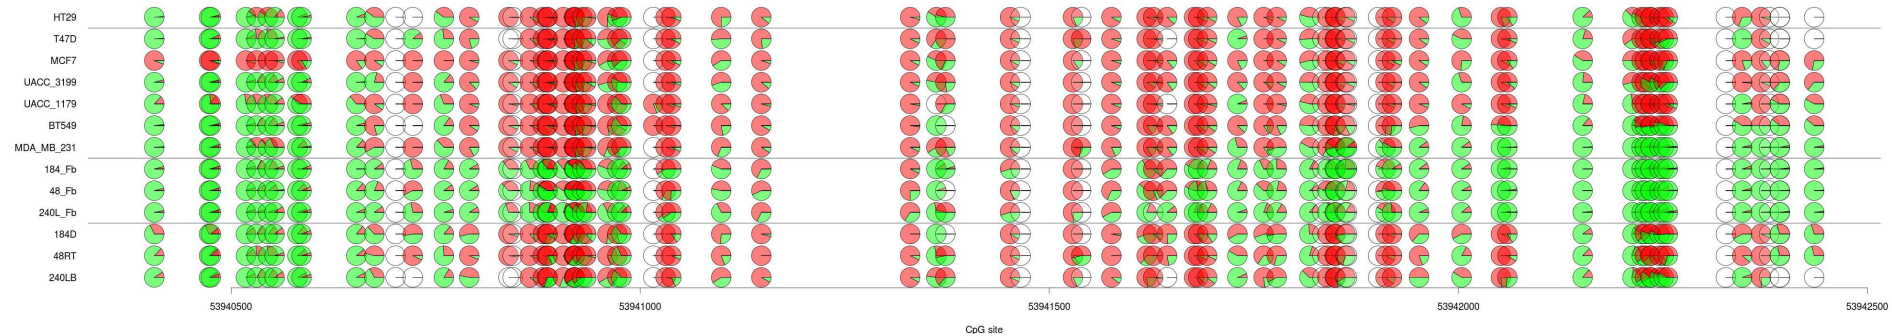





# LEF1

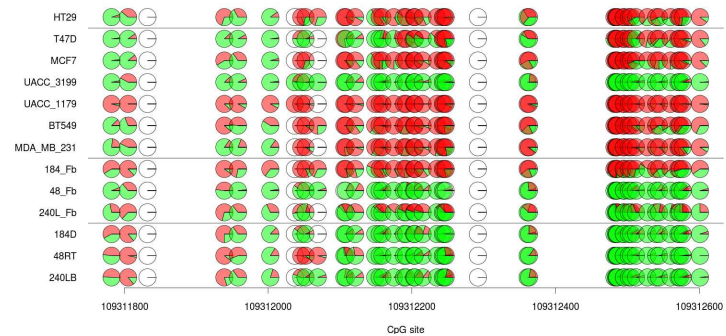



# LGR4

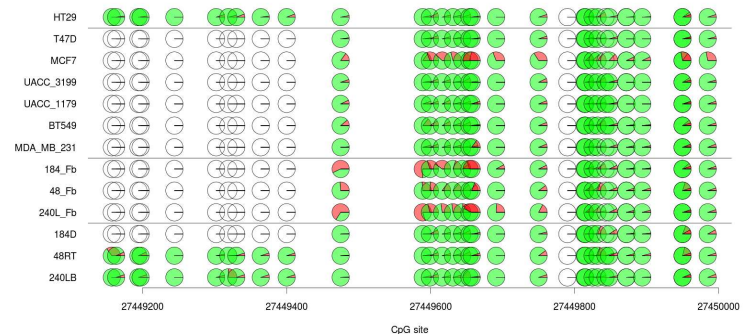

# LMX1A

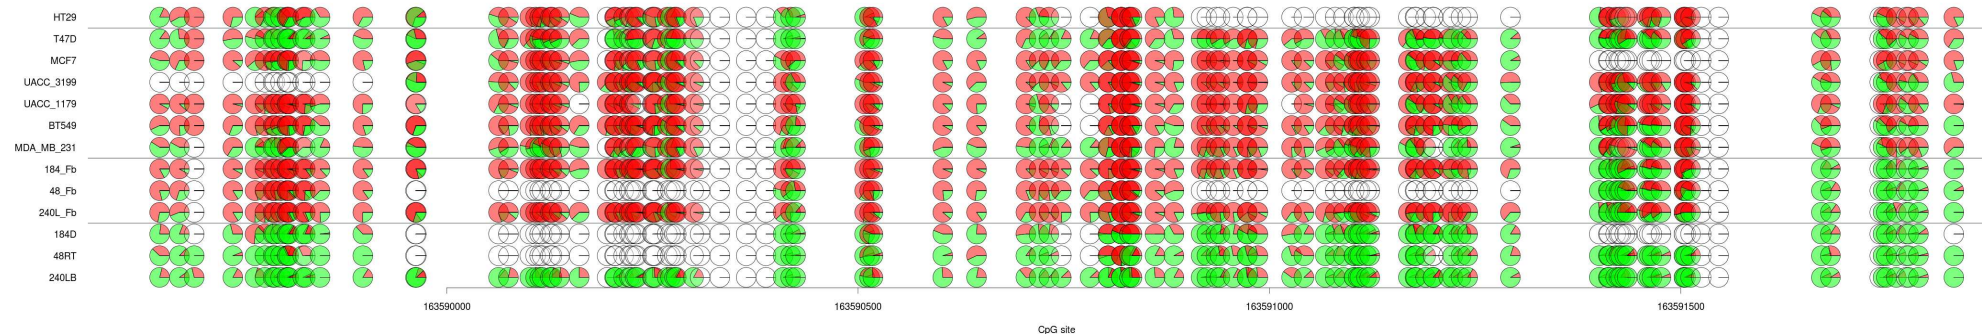

# LOC100127888

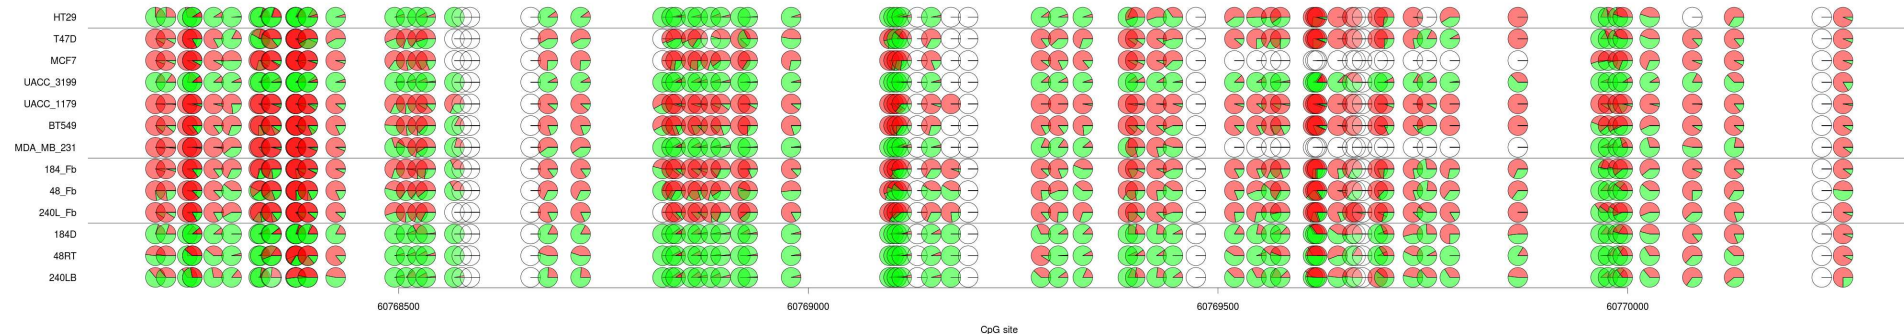

# LOC283514

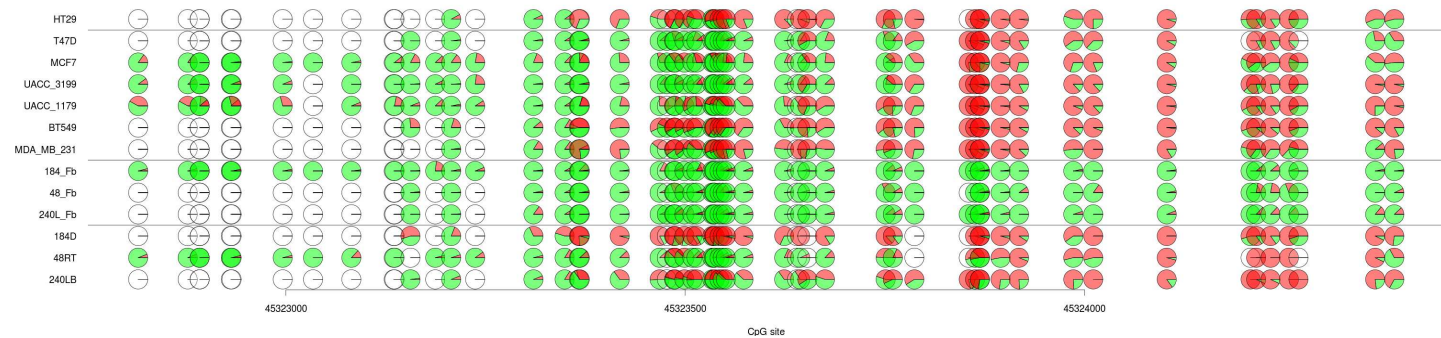



# MAB21L1

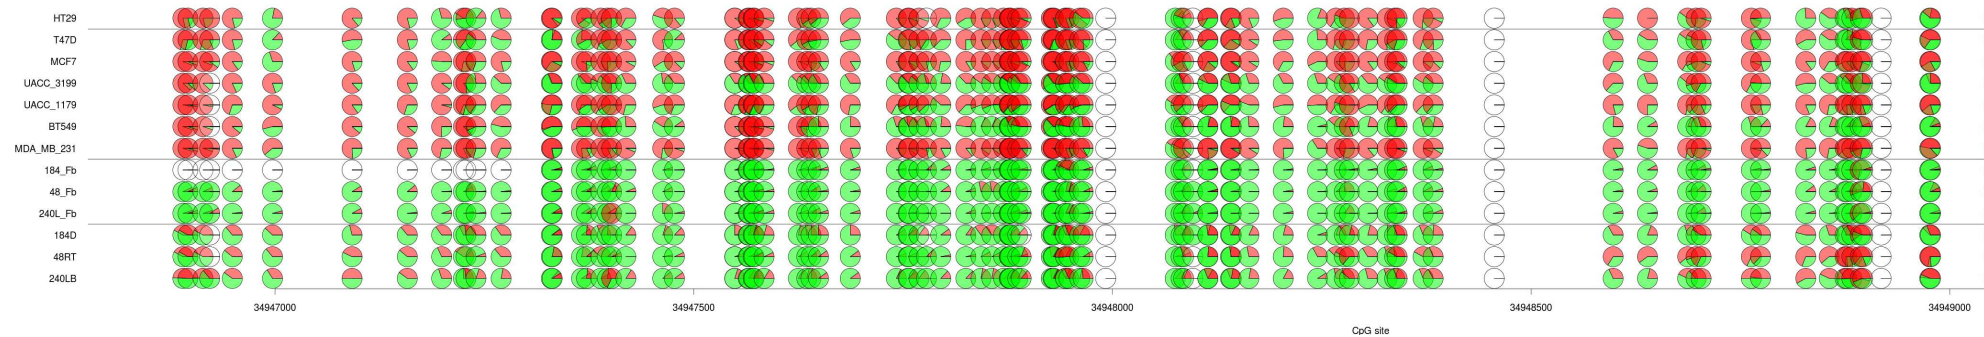

# MAMDC2

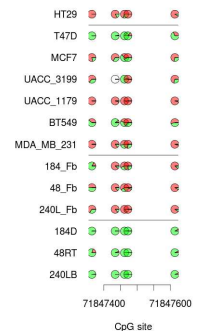

# MLNR

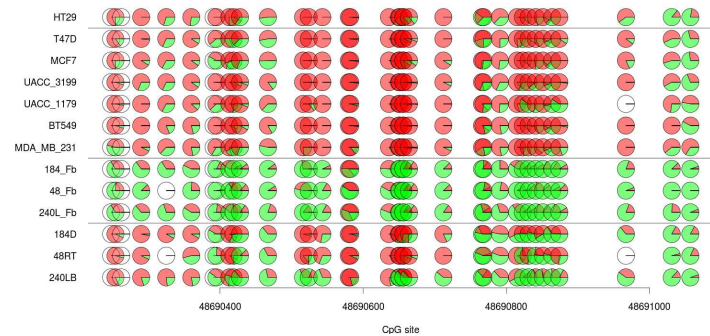



# MSTP9

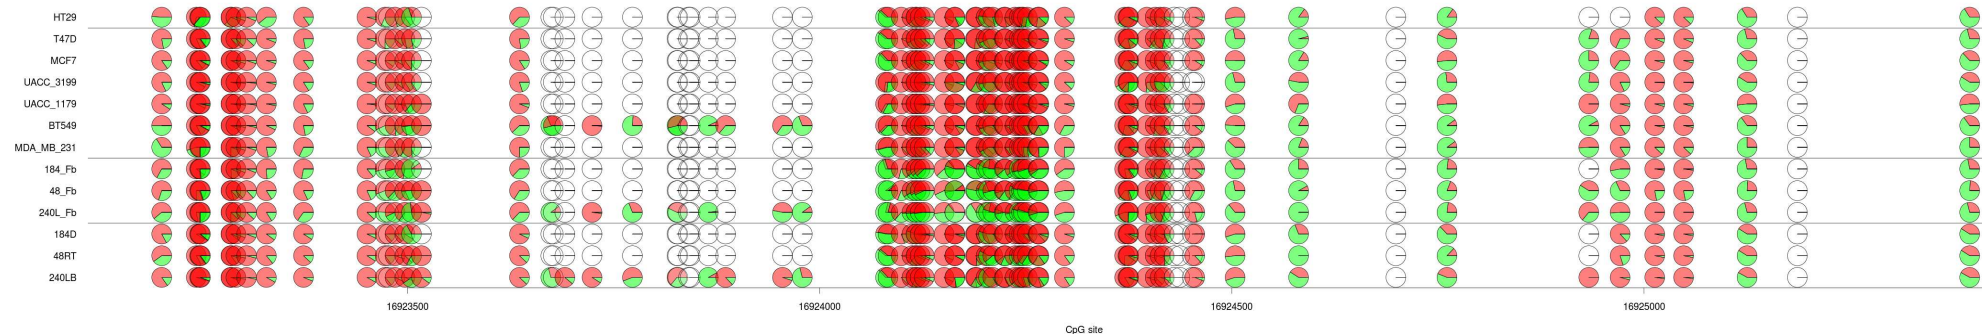

# NEUROG2

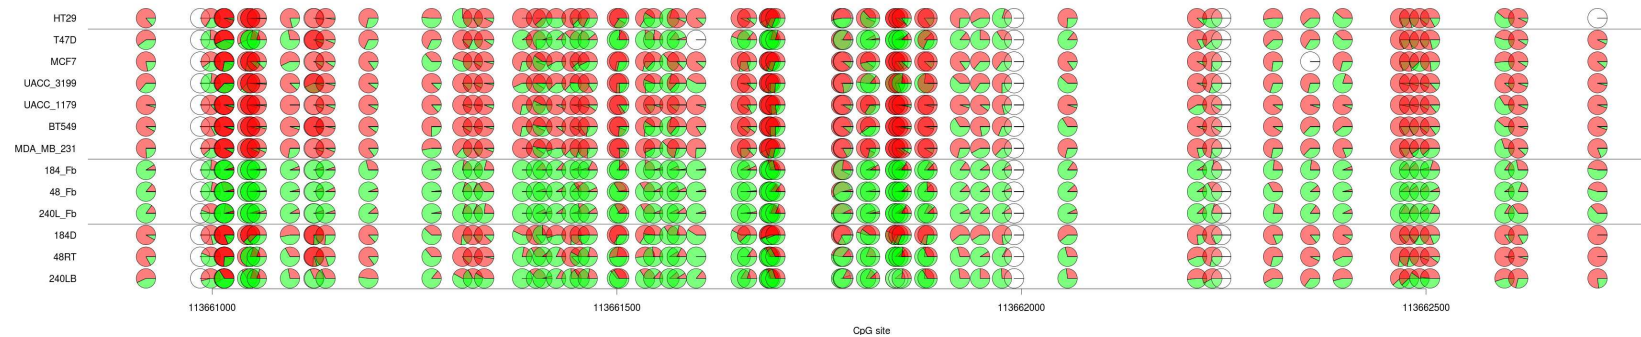

# NKD2

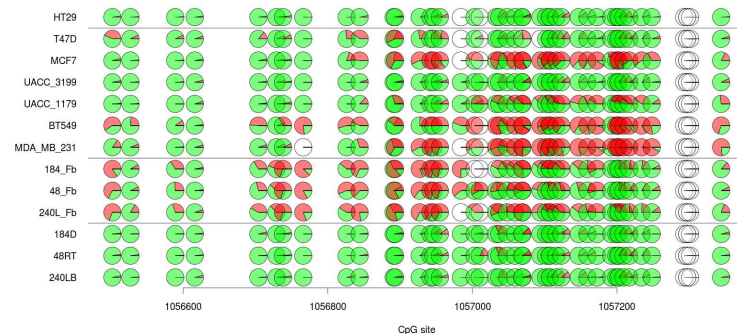

# OAT

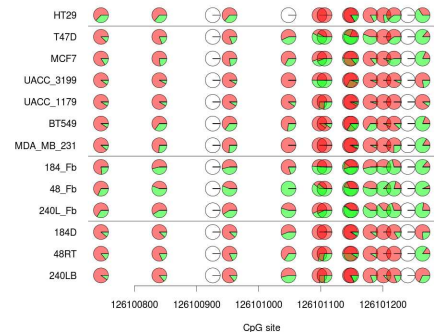

# OR10G7

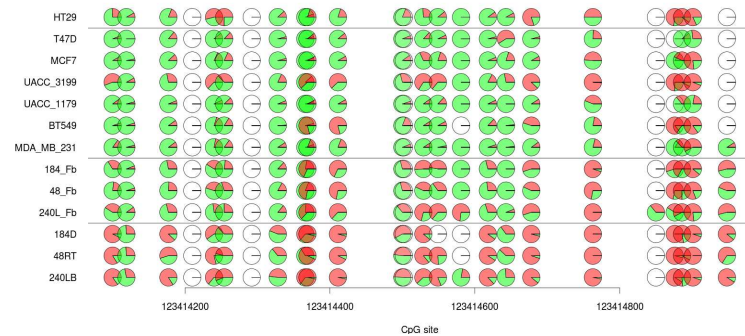

# OR2A20P

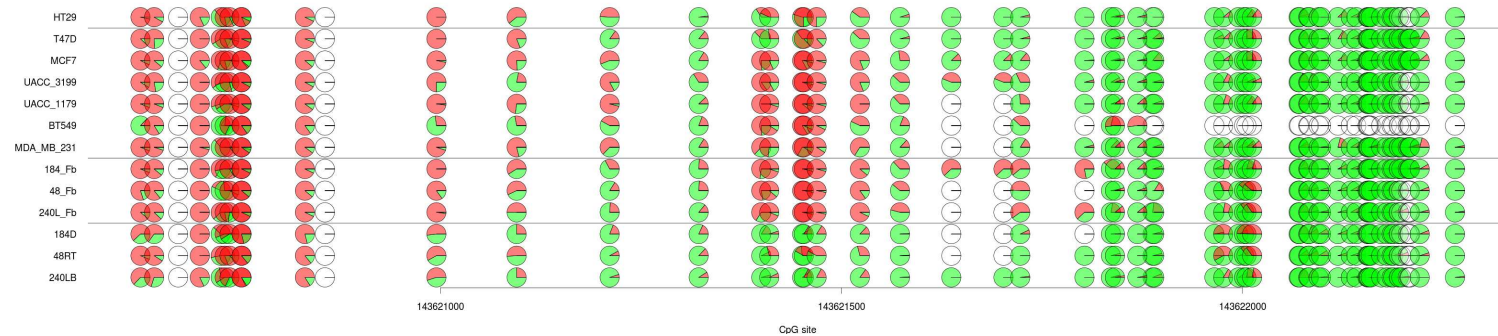

# OR4Q3

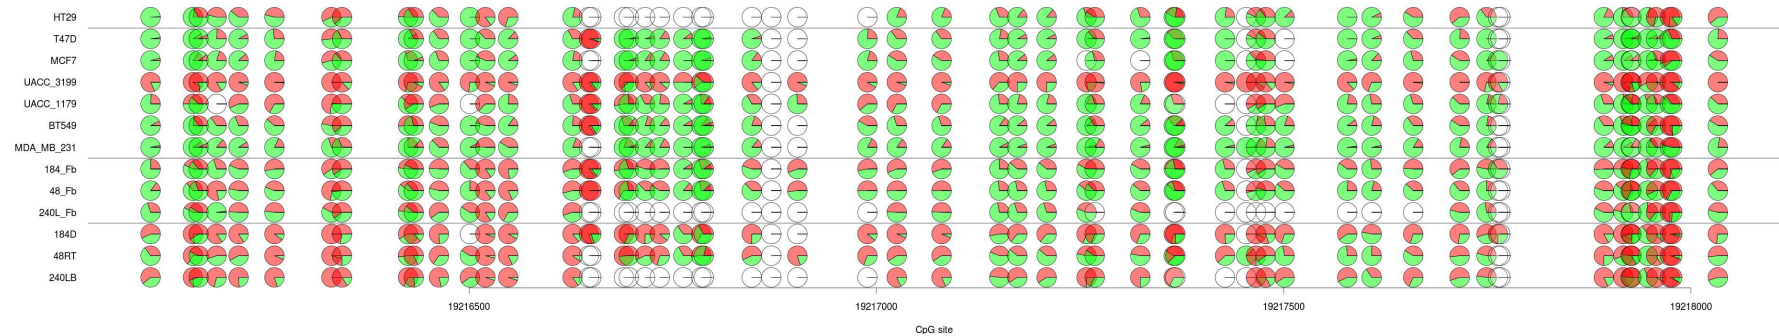

# OR5P3

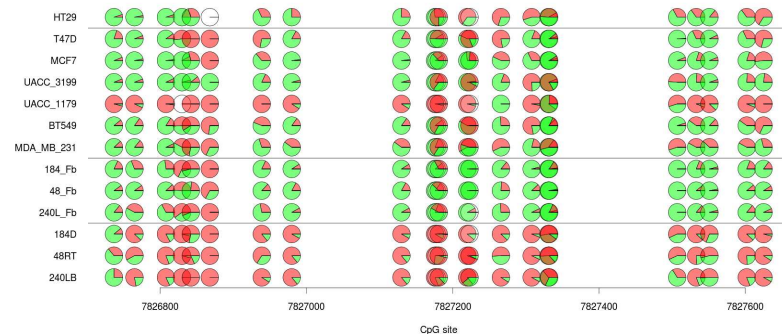



# PLEKHB1

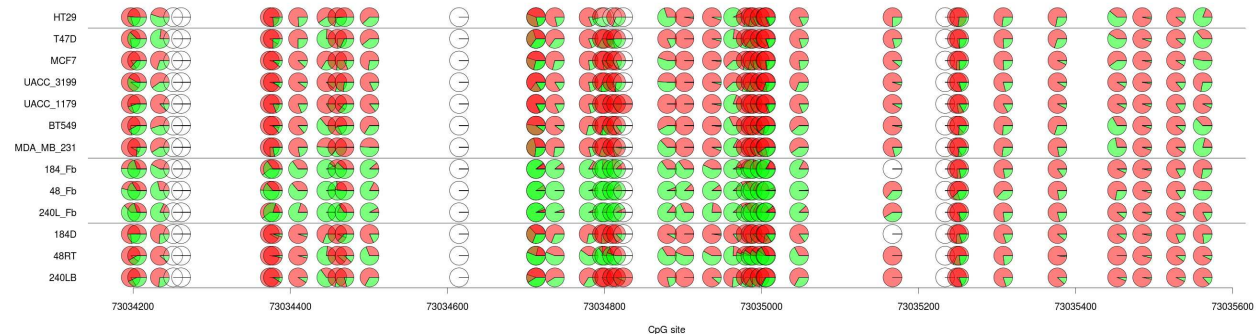

# PMS2L11

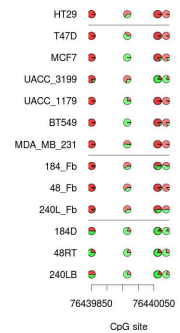

# PRAMEF1

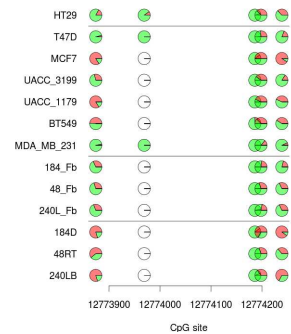

# PTGFR

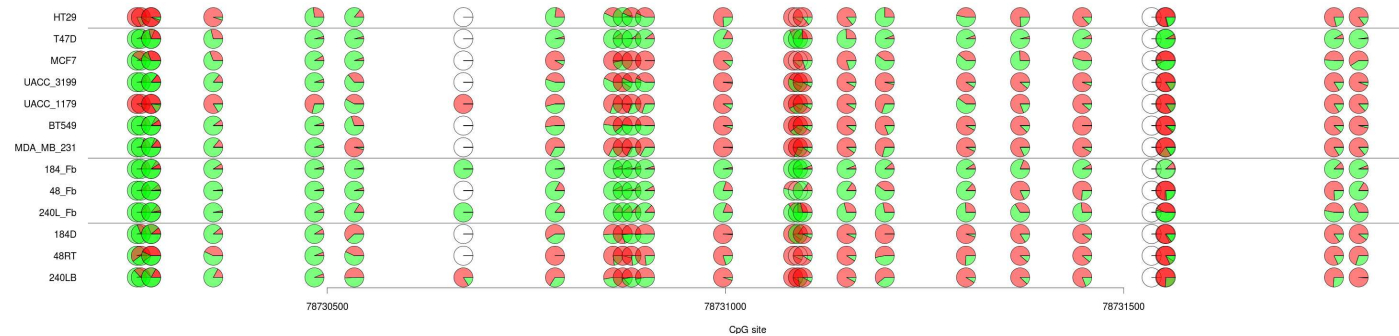

# RNASE7

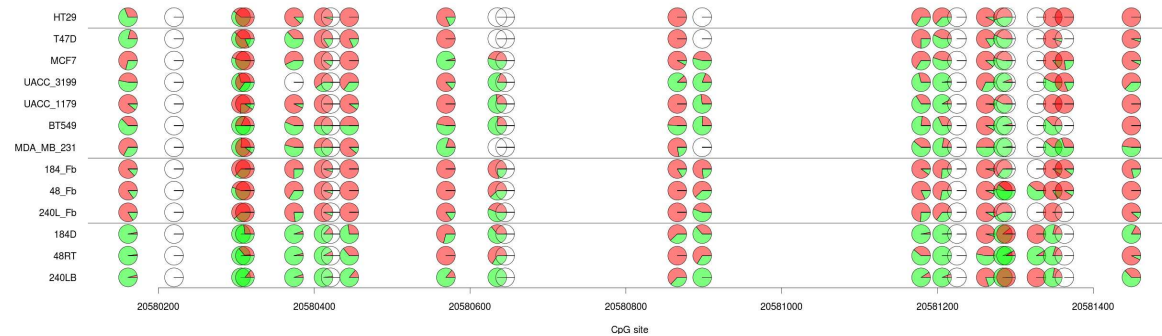

# SDPR

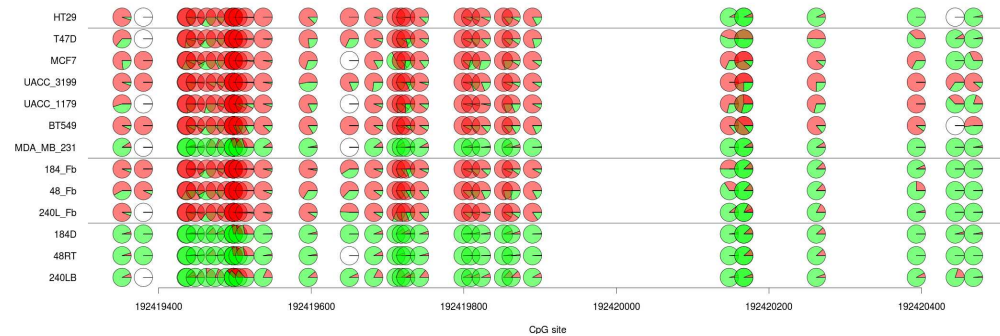

# SHH

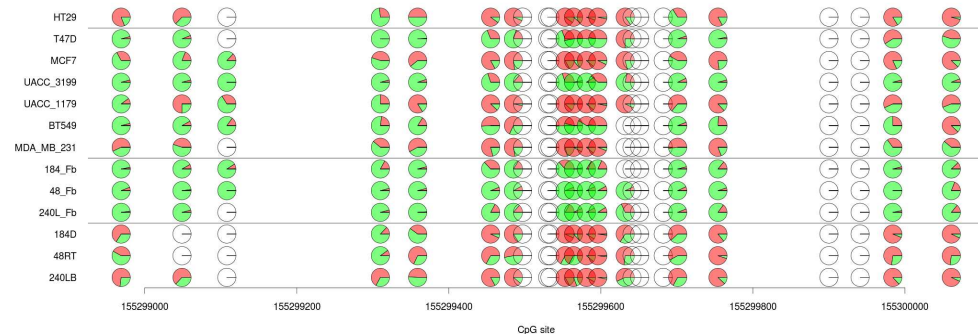

# SLC35F3

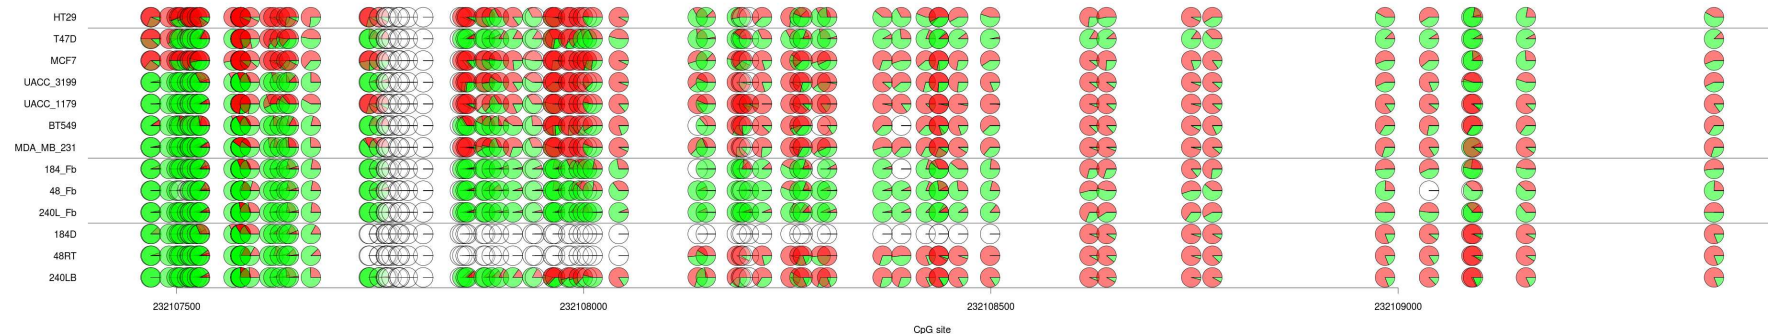



# SS18L1

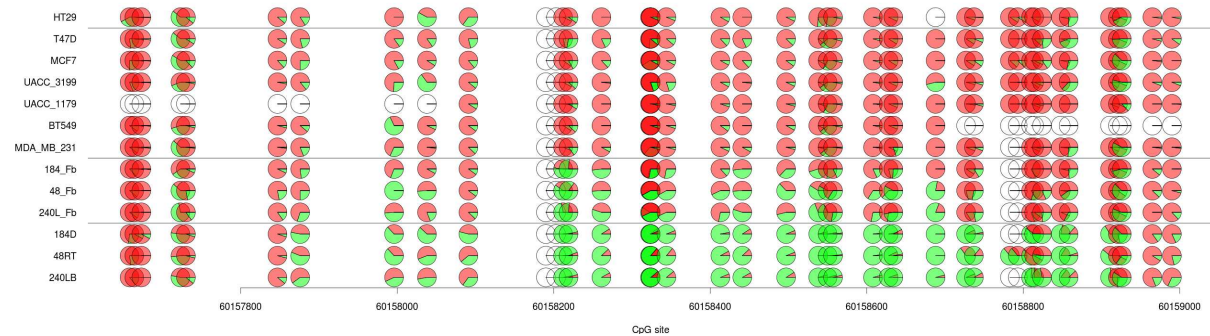

# STARD13

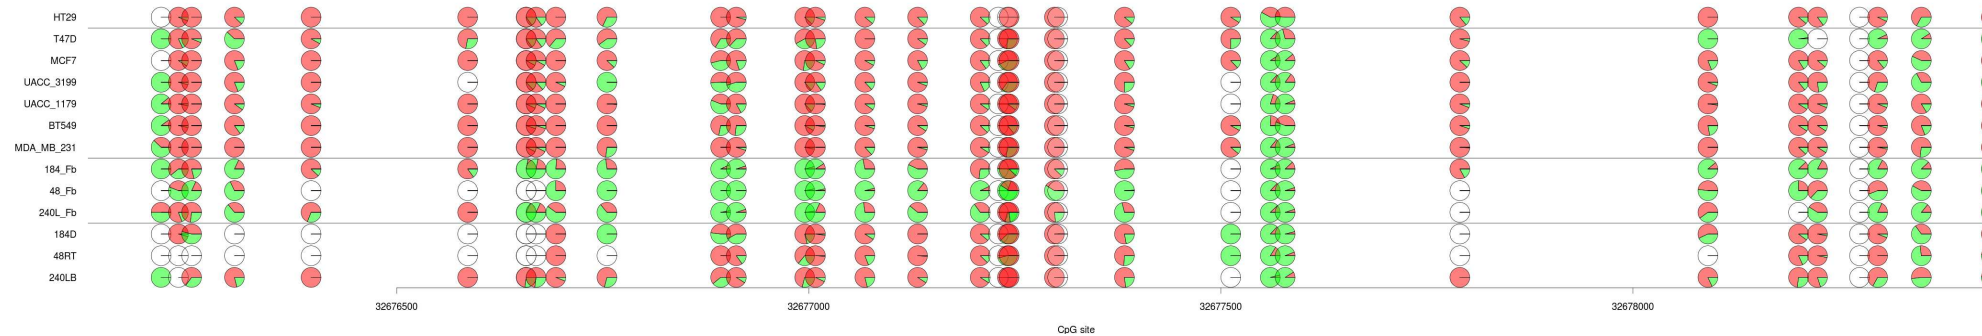



# TBX18

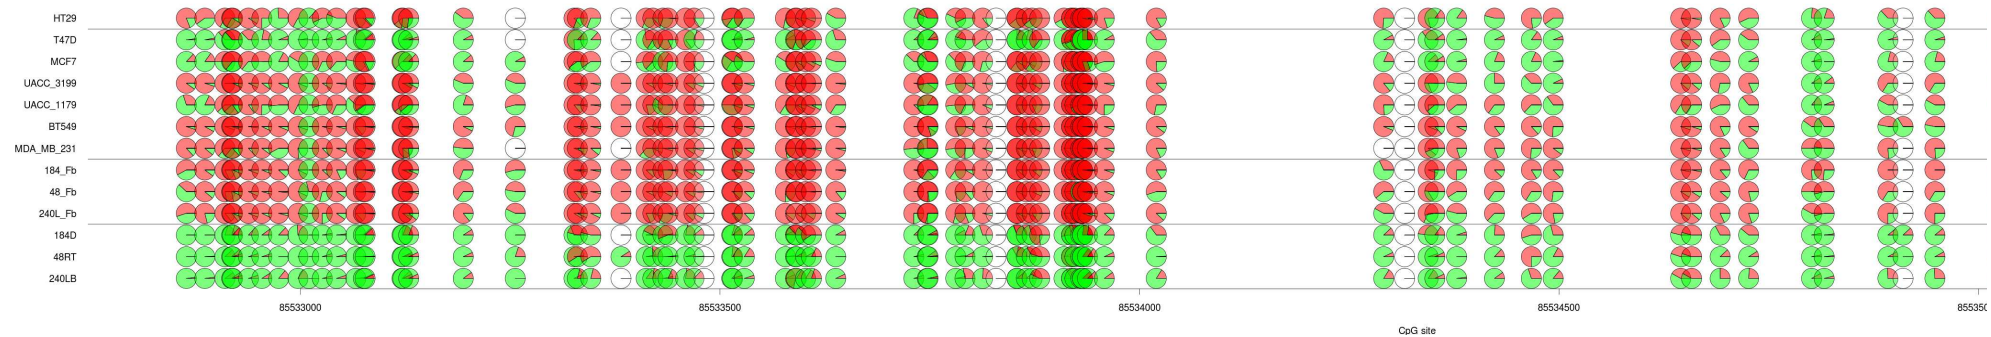

# TJP2

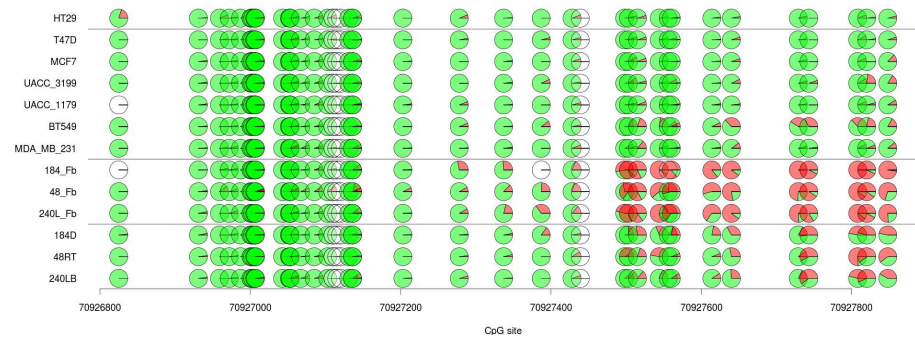

# TSLP

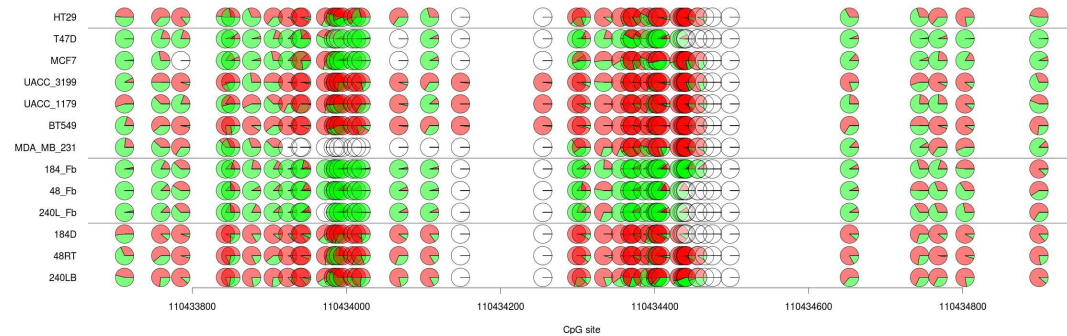

Supplement: pone.0052299.s003.pdf [file pone.0052299.s003.pdf]
